# Supplementary material for: Pollinator population size and pollination ecosystem service responses to enhancing floral and nesting resources
Source: PubMed Central journal article supplement (PMC5355185; doi:10.1002/ece3.2765), 2017-02-19
Supplement: ECE3-7-1898-s001.pdf [file ECE3-7-1898-s001.pdf]

# Supplementary Information to the manuscript "*Predicting pollinator population size and pollination ecosystem service responses to enhancing floral and nesting resources*"

Johanna Häussler<sup>a</sup>, Ullrika Sahlin<sup>a</sup>, Charlotte Baey<sup>a</sup>, Henrik Smith<sup>a,b</sup>, and Yann Clough<sup>a</sup>

<sup>a</sup>Lund University, Centre for Environmental and Climate Research, SE-223 62  
Lund, Sweden

<sup>b</sup>Lund University, Department of Biology, Biodiversity, Ecology Building, SE-223  
62 Lund, Sweden

January 23, 2017

## 1 Region considered

1 Our model is parameterised for land uses and common crop-visiting bumble bees found in North,  
2 Northwest and parts of Central Europe. Conveniently, numerous empirical studies on bumble  
3 bees have been conducted in this region. The landscapes we run the model on are situated  
4 in southernmost Sweden, in the province of Skåne. An overview of the land-use in Scanian  
5 landscapes is given in Persson et al. (2010).

## 6 2 Pollinator species selection

7 Because the paper is focused on the provision of pollination services to early-flowering crops  
8 such as oilseed rape, we chose to consider a fictive bumble bee species that stands for several  
9 early-active species that are known to visit these crops in the region. These species are *Bombus*  
10 *terrestris*, *Bombus lucorum* and *Bombus lapidarius*. Besides being amongst the most important  
11 crop visiting bee species (Kleijn et al., 2015), they are also generally common in other habitats.  
12 For instance, these species made up two thirds of the number of bumble bees spotted in a large  
13 citizen survey conducted in the UK (Table 1 in Osborne et al. 2008). The selected species have  
14 several things in common: they have large colonies, large foraging ranges, and nest belowground  
15 (Hagen, 1994; Persson et al., 2015).

## 16 3 Choice of land-use classes

17 Our choice of land-use classes was driven by the data sources we used: the IACS (Integrated  
18 Administration and Control System) database which contains for each year the crops grown in  
19 each field block, and the Swedish Marktäcke Data (SMD), which is largely analogous to the  
20 CORINE Landcover data, including in the naming of the classes. This choice was motivated by

21 the fact that these or very similar data are available across Europe. More detailed habitat data  
22 would be very country or region-specific in attributes and classes.

23 The Swedish IACS is only partly spatially explicit in that it only contains the number of  
24 hectares of each crop per block and the total block area, but not the location of fields within  
25 field block. An algorithm was programmed to assign crops-within-block to cells-within-block.  
26 This results in contiguous fields within block. A random process is used to decide for each block  
27 whether fields are oriented along a North-South or a East-West axis.

28 We considered that suburban areas as identified in the SMD data are one third garden, and  
29 two thirds built-up (houses, roads etc. ), which is an approximation based on satellite images  
30 assessed in Google Earth.

## 31 4 Choice of seasons

32 In the region, oilseed rape is the dominant mass-flowering crop, offering large amount of floral  
33 resources early in the season, around April-May. Arable-dominated regions contains much less  
34 flowers in the period between June and September, unless specific measures are taken, such as  
35 the establishment of wildflower strips. The cover of early vs. later flowering resources is of great  
36 interest for bumble bee population dynamics (Westphal et al., 2009; Riedinger et al., 2015) and  
37 therefore for the build-up of pollinator populations.

## 38 5 Scoring floral value and nesting quality

39 A preliminary expert assessment was conducted with Maj Rundlöf and Ola Olsson (Lund Univer-  
40 sity) in late 2014 in which all the land-use classes were assigned scores for three variables: floral  
41 cover, floral attractiveness for bumble bees, and nesting quality. Floral cover and floral attractive-  
42 ness furthermore were scored separately for the two periods (April-May and June-September).  
43 Land-use classes and corresponding floral and nesting values are listed in Table S4.

44 Floral cover was defined as the proportion area covered by flowers. Floral attractiveness was  
45 defined as a score ranging from zero (not at all attractive, never used) to 20 (very attractive,  
46 preferred over other flowers). Floral cover was multiplied by floral attractiveness to obtain the  
47 species-specific floral value scores. Nesting quality was defined as a score ranging from zero  
48 (totally unsuitable) to one (very suitable). Scoring was based on both personal experience of  
49 encountering nest-searching queens, as well as on the presence of suitable nesting substrate.

50 Information on the absolute and relative nesting densities in different habitats was retrieved  
51 from published results of a citizen survey of bumble bee nest densities conducted in the UK  
52 (Osborne et al., 2008), and transect survey of nest-searching queens from Sweden (Svensson  
53 et al., 2000). We found the correspondences between the land-uses in those papers and the  
54 classes used here. Plots of the expert estimates against literature findings were very good (Fig.  
55 S1). Unpublished work comparing floral cover data and expert assessments suggest that while  
56 very low floral cover values tend to be overestimated by experts, ranks are largely conserved.  
57 This suggests that for the illustrative purposes of this study the parameters are useful, but that  
58 further work is necessary to quantify floral value more soundly for further onward use.

## 59 6 Defining maximum nest densities

60 An overview of landscape-wide and habitat-specific nest densities reported in the literature is  
61 given in Table S1. Besides gardens (which we do not consider explicitly as a land-use class), the

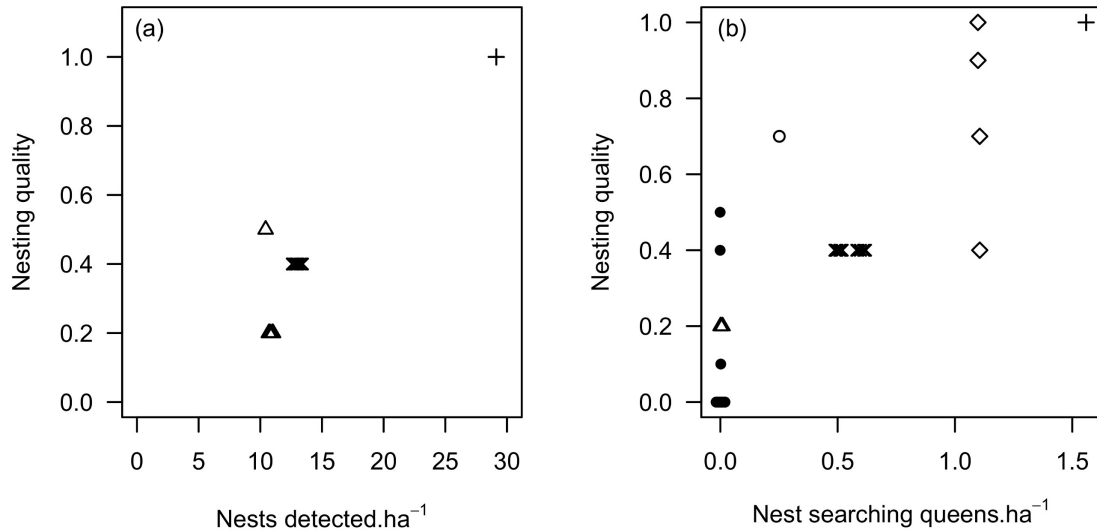

Figure S1: Nesting quality scores plotted against number of nests per ha detected in Osborne et al. (2008) and number of *Bombus terrestris*, *lapidarius* and *lucorum* queens detected searching for nests in Svensson et al. (2000). Filled circles are arable fields, standing crosses are edge habitats, crosses are grassland (pasture, leys), open triangles are woodland and forest habitats, open circles are forest clearings, open diamonds are other open habitat.

62 highest nest densities are observed in field edges, hedges and woodland edges (Table 2 in Osborne  
 63 et al. (2008)). Since we do not distinguish between edge types in the current study, we used the  
 64 mean density observed in the three edges as maximum nest density. We used the mean and  
 65 not the maximum because we considered it likely that good bumble bee habitats were favored  
 66 in the citizen survey. The maximum nest density was multiplied by the nest quality score (see  
 67 above) to obtain the maximum nest density for the different land-classes. In addition, because  
 68 the densities in Osborne et al. (2008) refer to total bumble bee nests rather than just those of  
 69 the species we consider here, we multiply the maximum nest density for all bees by 0.66, because  
 70 approximately two thirds of the nests found in the study could be assigned to the color groups  
 71 corresponding to our species (Table 1 in Osborne et al. (2008)).

## 72 7 Foraging distance and shape of the dispersal kernel

73 We derived the choice of the dispersal kernel shape and the values for the mean dispersal distance  
 74 from mark-recapture data for *B. terrestris* aggr. (includes *B. terrestris*, *B. lucorum* and *B.*  
 75 *cryptorum*) and *B. lapidarius* published in Walther-Hellwig and Frankl (2000). We chose an  
 76 exponential dispersal kernel and used a least-squares approach to estimate the mean dispersal  
 77 distance from the quantiles given in the Figure of Walther-Hellwig and Frankl (2000), leading to  
 78  $\beta_{foraging} = 530$ . For illustration, a half of a one-dimensional kernel is shown in Figure S2.

Table S1: Landscape-wide and habitat-specific nest densities reported in the literature. Methods used were nest searches (Skovgaard, 1936; Osborne et al., 2008), and genetic markers (Darvill et al., 2004; Knight et al., 2005). Landscape-scale densities from Osborne et al. (2008) are upscaled from habitat-specific data.

| Study                 | Habitat               | Density<br>(nests.ha <sup>-1</sup> ) | Species              | Region  |
|-----------------------|-----------------------|--------------------------------------|----------------------|---------|
| Skovgaard (1936)      | Different habitats    | 11-28                                | all                  | Denmark |
| Harder (1986)         | Refuse dump           | 50                                   | all                  | England |
| Darvill et al. (2004) | Landscape             | 0.13                                 | <i>B. terrestris</i> | England |
| Knight et al. (2005)  | Landscape             | 0.3                                  | <i>B. terrestris</i> | England |
| Knight et al. (2005)  | Landscape             | 1.2                                  | <i>B. lapidarius</i> | England |
| Knight et al. (2005)  | Landscape             | 2.4                                  | Four common species  | England |
| Osborne et al. (2008) | Landscape             | 7                                    | all                  | England |
| Osborne et al. (2008) | Good nesting habitats | 10-30                                | all                  | UK      |
| Wood et al. (2015)    | Landscape             | 0.1-1.7                              | <i>B. terrestris</i> | UK      |
| Wood et al. (2015)    | Landscape             | 0.1-0.7                              | <i>B. lapidarius</i> | UK      |

## 8 Population growth

The maximum number of workers ( $w_{max} = 600$ ) produced is based on values for *B. terrestris* from Hagen (1994), which is consistent with the high-end values reported in other papers (Table S2). The maximum number of queens ( $q_{max} = 160$ ) is based on Duchateau and Velthuis (1988). According to these authors, *B. terrestris* colonies are about equally distributed between two types, with early-switching colonies producing few workers, very large numbers of males and few or no queens, and late-switching colonies producing many workers, and both queens and males. We take the mean of the maxima (Duchateau and Velthuis, 1988) for these two types ( $q_{max} = 160$ ). The growth functions for queens and workers as described in the main paper are illustrated in Figure S3.

As stated in the paper, we fixed the growth parameter  $a_q$  for bumble bee queens to

$$a_q = a_w p_w \frac{w_{max}}{2} \quad (1)$$

The value on  $a_q$  were chosen as a value small enough to ensure stable bumble bee populations in the landscapes included in our study and at the same time avoid landscapes that are fully saturated with bumble bees during the initialisation phase. In this way there were a pollinator population present in all study landscapes when the management interventions were implemented.

## 9 Foraging activity

We consider that 50 percent of the workers forage ( $p_w = 0.5$ ) based on data listed in Table S3. Goulson et al. (2002b) reports that 31.6 $\pm$ 2.5 percent of *B. terrestris* workers from commercial nests were away from their nests. Free (1955) reports that only about a third of the workers forage

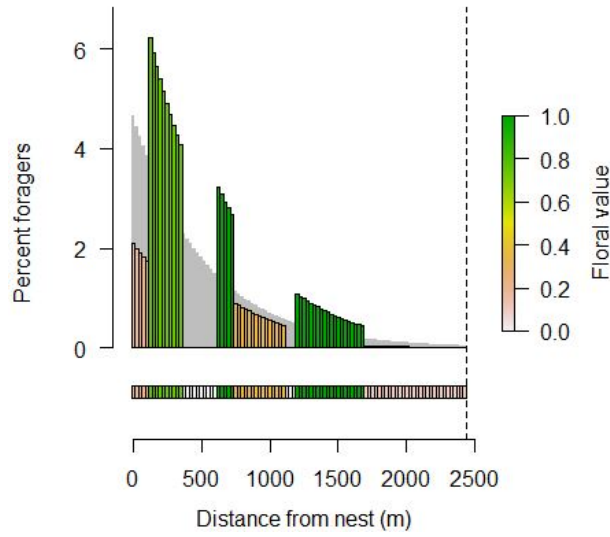

Figure S2: Proportion of foragers visiting a resource cell  $i$  at increasing distances  $d_{i,j}$  from the nesting cell  $j$ , when floral values are equal (gray) or different (color-scale) across the landscape.

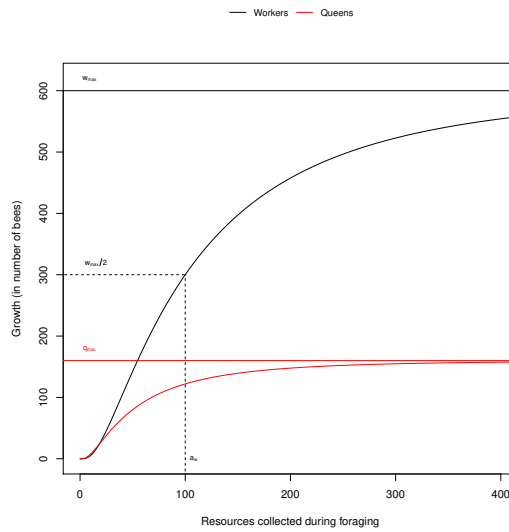

Figure S3: Growth functions giving the number of workers produced per queen during the first period (black curve) and the number of new queens produced at the end of the season (red curve), according to the proportion of workers produced compared to the maximum  $w_{max}$ .

Table S2: Worker numbers per nest reported in the literature.

| Study                         | Habitat                      | Species                      | Estimate                | Comment             |
|-------------------------------|------------------------------|------------------------------|-------------------------|---------------------|
| Goulson et al. (2002a)        | Gardens                      | <i>B. terrestris</i>         | 156.5 ± 20.0 (SE, n=10) | Commercial colonies |
| Goulson et al. (2002a)        | Farm landscape, conventional | <i>B. terrestris</i>         | 167.0 ± 29.1 (SE, n=9)  | Commercial colonies |
| Goulson et al. (2002a)        | Farm landscape, diverse      | <i>B. terrestris</i>         | 160.0 ± 23.4 (SE, n=9)  | Commercial colonies |
| Duchateau and Velthuis (1988) | Unspecified                  | <i>B. terrestris</i> (early) | 36.9 ± 58.8 (n=8)       | Wild-caught queens  |
| Duchateau and Velthuis (1988) | Unspecified                  | <i>B. terrestris</i> (late)  | 284.3 ± 145.0 (n=10)    | Wild-caught queens  |
| Hagen (1994)                  | Unspecified                  | <i>B. lapidarius</i>         | 100 to 320              | Unspecified         |
| Hagen (1994)                  | Unspecified                  | <i>B. terrestris</i>         | 100 to 600              | Unspecified         |

99 more than 70 percent of the time, a third stay in the nest, and another third forages occasionally.  
 100 Unfortunately relatively few nests were observed, only one very small one of *B. terrestris*, but  
 101 the overall pattern was valid across species and nest sizes. Data from Brian (1952), consisting in  
 102 daily observations of 2 × 1h, conducted during 40 days for *Bombus pascuorum* (= *B. agrorum*)  
 103 suggest that 30-55 percent of the workers foraged during the observation periods, with larger  
 104 proportions observed only at the end of the season when drones had been produced and foragers  
 105 had died off (55-72 percent foragers).

## 106 10 Dispersal of new queens, overwintering, and competition 107 for nests

108 Little is known about the dispersal of new queens and the overwintering stage. Impacts of locally  
 109 establishing flower resources have been detected at the same spot the year after (Scheper et al.,  
 110 2015) suggesting that a significant part of the new queens nest in the vicinity of the old nest  
 111 the following year. There is a large uncertainty in the distance the queens travel. Since we have  
 112 estimates on the mean foraging distance, and the new queens may be expected to cover the same  
 113 distance as a return trip to the a foraging we set  $\beta_{nesting} = 1000$ , i.e. about equal twice  $\beta_{foraging}$ .

114 There is evidence for competition for nesting sites among bumble bee species that use existing  
 115 structures such as rodent holes to nest (McFrederick and LeBuhn, 2006). This applies to the  
 116 species considered here. We therefore decided to cap the nesting densities at their maxima,  
 117 considering that any additional queens will die.

Table S3: Percentage bumble bee workers foraging reported in the literature.

| Study                  | % workers foraging | Colony development stage |
|------------------------|--------------------|--------------------------|
| Goulson et al. (2002b) | 31.6%              | Middle                   |
| Brian (1952)           | 30 to 55%          | Early - middle           |
| Brian (1952)           | 55-72%             | late                     |
| Free (1955)            | 30-60%             | Probably early           |

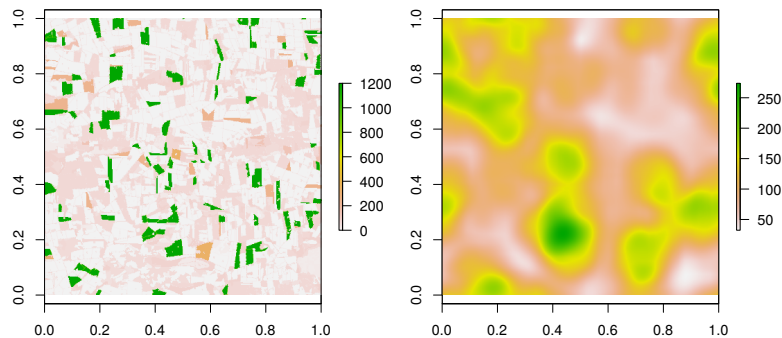

Figure S4: Weighting of floral resources (original values, left) in the landscape using a Gaussian kernel (weighted values, right). High values on the colour scale indicating a higher weighting.

## 118 11 Flower strip placement algorithm

119 The number of flower strips to be placed in the landscape is proportional to the percentage of  
 120 agricultural land in the landscape, and their locations depend on the availability of resources  
 121 nearby. More precisely, the probability for a flower strip to be placed at a given location is  
 122 proportional to the ratio of floral resources in period 1 and period 2, with floral resources around  
 123 a cell being computed using a Gaussian kernel (Fig. S4). Field edges and non-agricultural land  
 124 are also excluded. Flower strips are placed sequentially in the landscape, and every time a new  
 125 flower strip is settled, the probability for a cell to be selected as a future flower strip location is  
 126 reduced according to the distance from the currently selected flower strip. An illustration of the  
 127 algorithm is given in Figure S5.

128 See the R file `flowerStripsPlacement.R` for more details.

## 129 12 Landscape selection

130 To ensure uncorrelated gradients of landscape heterogeneity and proportion of oilseed rape in the  
 131 landscape, we selected a subset of 20  $10 \times 10$  km landscapes from an initial set of 43 landscapes.  
 132 Using the D-optimality criterion (St. John and Draper, 1975), this subset of landscapes (Fig.  
 133 S6) was chosen to be optimal to test linear, quadratic and interaction effects from temporal  
 134 averages of oilseed rape area and landscape heterogeneity. By maximizing the determinant of the  
 135 information matrix of the design, the D-optimality design creates the optimal set of experiments.  
 136 It was implemented in the R-packaged AlgDesign (Wheeler, 2014) using the Federov algorithm.

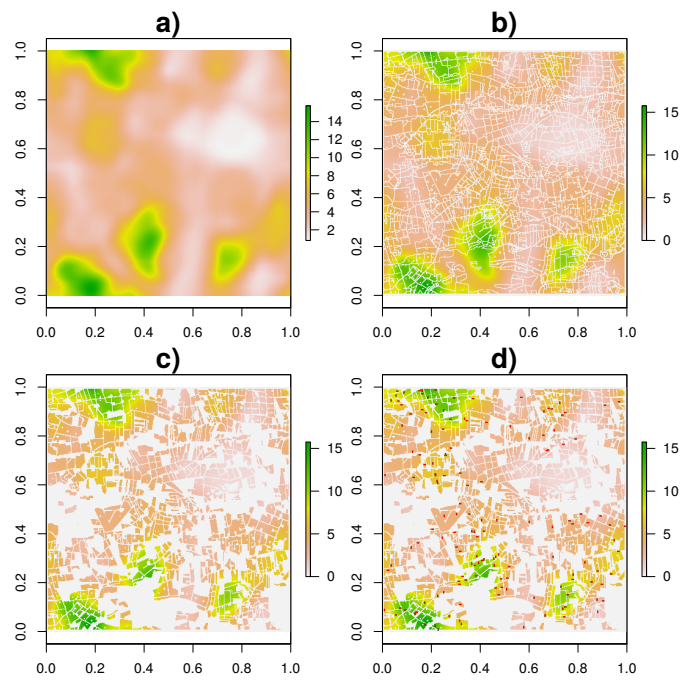

Figure S5: Flower strip placement algorithm: a) Weights are assigned to every cell of the landscape according to the ratio of floral resources in periods 1 and 2 (high values on the colour scale indicating a higher weighting), b) field edges are excluded from the set of possible locations, c) non-agricultural lands are excluded and d) final placement of flower strips in the landscape.



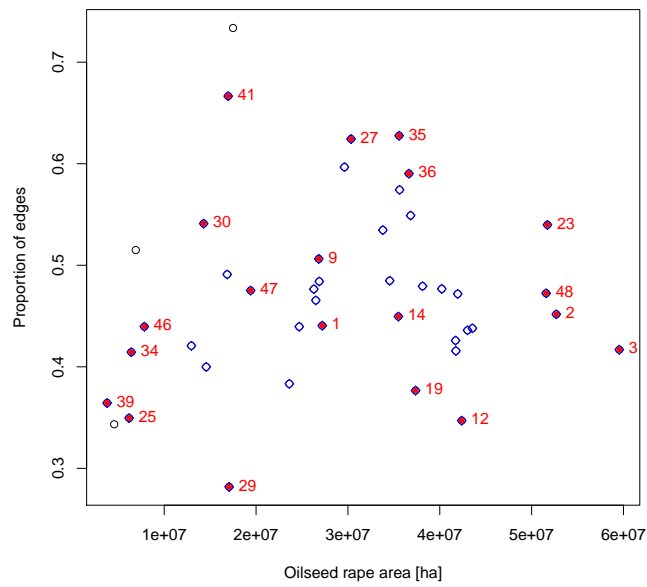

Figure S6: Relationship between the area of oilseed rape and landscape heterogeneity of the initial set of 43 landscapes. Landscapes with bumble bee population sizes above zero after leveling off population sizes after initialization are highlighted with blue borders. The subset of 20 landscapes included in our study which were selected using the D-optimality criterion are additionally highlighted in red and their corresponding landscape identification number.

Table S4: List of land-use classes and corresponding values of floral cover for each floral period, floral attractiveness for bumble bees for each floral period, and nesting attractiveness for bumble bees as well as the maximum number of nests per ha. Non-defined land-use classes are not included. Abbreviations: FC = Floral cover in period 1 or 2; FA = Floral attractiveness for bumble bees in period 1 or 2; NA = Nesting attractiveness for bumble bees.

| Land-use code | Description                  | FC 1  | FC 2  | FA 1  | FA 2  | NA   | Nests per ha |
|---------------|------------------------------|-------|-------|-------|-------|------|--------------|
| 1             | Barley (autumn)              | 0.01  | 0.01  | 5.00  | 0.00  | 0.00 | 0.00         |
| 2             | Barley (spring)              | 0.02  | 0.01  | 5.00  | 0.00  | 0.00 | 0.00         |
| 3             | Oats                         | 0.02  | 0.01  | 5.00  | 0.00  | 0.00 | 0.00         |
| 4             | Wheat (autumn)               | 0.01  | 0.01  | 5.00  | 0.00  | 0.00 | 0.00         |
| 5             | Wheat (spring)               | 0.02  | 0.01  | 5.00  | 0.00  | 0.00 | 0.00         |
| 6             | Mixed crops                  | 0.02  | 0.01  | 5.00  | 0.00  | 0.00 | 0.00         |
| 7             | Triticale                    | 0.02  | 0.01  | 5.00  | 0.00  | 0.00 | 0.00         |
| 8             | Rye                          | 0.02  | 0.01  | 5.00  | 0.00  | 0.00 | 0.00         |
| 9             | Maize                        | 0.01  | 0.01  | 2.00  | 3.00  | 0.00 | 0.00         |
| 10            | Buckwheat                    | 0.10  | 80.00 | 5.00  | 10.00 | 0.00 | 0.00         |
| 11            | Cereal trials                | 0.02  | 0.01  | 5.00  | 0.00  | 0.00 | 0.00         |
| 12            | Mixed crops (grains)         | 0.02  | 0.01  | 5.00  | 0.00  | 0.00 | 0.00         |
| 13            | Mixed crops (grains/legumes) | 20.00 | 0.10  | 7.00  | 1.00  | 0.00 | 0.00         |
| 14            | Canary grass                 | 0.02  | 0.01  | 5.00  | 0.00  | 0.00 | 0.00         |
| 15            | Millet                       | 0.02  | 0.01  | 5.00  | 0.00  | 0.00 | 0.00         |
| 16            | Grains for fodder            | 0.02  | 0.01  | 5.00  | 0.00  | 0.00 | 0.00         |
| 17            | Bird field                   | 0.02  | 0.01  | 5.00  | 0.00  | 0.00 | 0.00         |
| 18            | Pasture <sup>1</sup>         | 0.19  | 0.11  | 12.00 | 12.00 | 0.40 | 0.00         |
| 19            | Mown meadow <sup>1</sup>     | 0.19  | 0.11  | 12.00 | 12.00 | 0.40 | 0.00         |
| 20            | Oilseed rape (autumn)        | 86.00 | 0.00  | 7.50  | 0.00  | 0.00 | 0.00         |
| 21            | Oilseed rape (spring)        | 0.00  | 86.00 | 2.00  | 15.00 | 0.00 | 0.00         |
| 22            | Turnip rape (autumn)         | 86.00 | 0.00  | 15.00 | 0.00  | 0.00 | 0.00         |
| 23            | Turnip rape (spring)         | 0.00  | 86.00 | 2.00  | 15.00 | 0.00 | 0.00         |

*Continued on next page*

<sup>1</sup> no single payment scheme, no compensatory allowance

Table S4 – *Continued from previous page*

| Land-use code | Description                               | FC 1  | FC 2  | FA 1  | FA 2  | NA   | Nests per ha |
|---------------|-------------------------------------------|-------|-------|-------|-------|------|--------------|
| 24            | Sunflower                                 | 0.10  | 80.00 | 5.00  | 18.00 | 0.00 | 0.00         |
| 25            | Oilseed trials                            | 86.00 | 0.00  | 15.00 | 0.00  | 0.00 | 0.00         |
| 26            | High eruca rape                           | 86.00 | 0.00  | 15.00 | 0.00  | 0.00 | 0.00         |
| 27            | White mustard                             | 0.02  | 0.01  | 0.00  | 0.00  | 0.00 | 0.00         |
| 28            | Oil-seed (fodder) radish                  | 0.00  | 86.00 | 2.00  | 15.00 | 0.00 | 0.00         |
| 30            | Peas (non-tinned)                         | 40.00 | 0.01  | 0.00  | 6.00  | 0.00 | 0.00         |
| 31            | Peas (tinned)                             | 40.00 | 0.01  | 0.00  | 6.00  | 0.00 | 0.00         |
| 32            | Broad bean                                | 0.10  | 50.00 | 5.00  | 15.00 | 0.00 | 0.00         |
| 33            | Sweet lupin                               | 0.10  | 50.00 | 5.00  | 15.00 | 0.00 | 0.00         |
| 34            | Protein-rich mixed crops (legumes/grains) | 20.00 | 0.10  | 7.00  | 1.00  | 0.00 | 0.00         |
| 35            | Brown beans                               | 0.10  | 50.00 | 5.00  | 15.00 | 0.00 | 0.00         |
| 36            | Vetch                                     | 0.10  | 50.00 | 5.00  | 15.00 | 0.00 | 0.00         |
| 37            | Chickpea                                  | 0.10  | 50.00 | 5.00  | 15.00 | 0.00 | 0.00         |
| 38            | Soybean (oilseed)                         | 0.10  | 50.00 | 5.00  | 15.00 | 0.00 | 0.00         |
| 39            | Soybean (fodder)                          | 0.10  | 50.00 | 5.00  | 15.00 | 0.00 | 0.00         |
| 40            | Linseed                                   | 30.00 | 60.00 | 5.00  | 10.00 | 0.00 | 0.00         |
| 41            | Flax                                      | 30.00 | 60.00 | 5.00  | 10.00 | 0.00 | 0.00         |
| 42            | Hemp                                      | 0.01  | 0.01  | 5.00  | 0.00  | 0.00 | 0.00         |
| 44            | Starch potato                             | 40.00 | 40.00 | 0.00  | 6.00  | 0.00 | 0.00         |
| 45            | Ware potato                               | 40.00 | 40.00 | 6.00  | 6.00  | 0.00 | 0.00         |
| 46            | Potato (processing)                       | 40.00 | 40.00 | 0.00  | 6.00  | 0.00 | 0.00         |
| 47            | Sugar beets                               | 0.01  | 0.01  | 0.00  | 0.00  | 0.00 | 0.00         |
| 48            | Fodder beets (mangel beets)               | 0.01  | 0.01  | 0.00  | 0.00  | 0.00 | 0.00         |
| 49            | Non-approved ley                          | 0.19  | 0.11  | 10.00 | 10.00 | 0.0  | 0.00         |
| 50            | Ley                                       | 0.19  | 0.11  | 10.00 | 10.00 | 0.40 | 7.71         |
| 51            | Ley <sup>2</sup>                          | 0.19  | 0.11  | 10.00 | 10.00 | 0.40 | 0.00         |
| 52            | Pasture                                   | 0.19  | 0.11  | 12.00 | 12.00 | 0.40 | 7.71         |
| 53            | Mown meadow                               | 0.19  | 0.11  | 12.00 | 12.00 | 0.40 | 0.00         |
| 54            | Forest pasture                            | 0.19  | 0.11  | 12.00 | 12.00 | 0.40 | 0.00         |

*Continued on next page*


---

<sup>2</sup> non eligible for agri-environmental scheme for cultivated grasslands

Table S4 – *Continued from previous page*

| Land-use code | Description                         | FC 1  | FC 2  | FA 1  | FA 2  | NA   | Nests per ha |
|---------------|-------------------------------------|-------|-------|-------|-------|------|--------------|
| 55            | Mountain pasture <sup>3</sup>       | 0.19  | 0.11  | 12.00 | 12.00 | 0.40 | 0.00         |
| 56            | Alvar pasture                       | 0.19  | 0.11  | 12.00 | 12.00 | 0.90 | 17.34        |
| 57            | Ley (contracted with fodder drying) | 0.19  | 0.11  | 10.00 | 10.00 | 0.40 | 0.00         |
| 58            | Seed ley (annual)                   | 17.00 | 17.00 | 20.00 | 20.00 | 0.10 | 1.93         |
| 59            | Seed ley (perennial)                | 17.00 | 17.00 | 20.00 | 20.00 | 0.40 | 7.71         |
| 60            | Fallow                              | 7.00  | 7.00  | 10.00 | 10.00 | 0.40 | 7.71         |
| 61            | Fallow (perennial)                  | 0.19  | 0.11  | 12.00 | 12.00 | 0.40 | 0.00         |
| 62            | Fallow (other)                      | 7.00  | 7.00  | 10.00 | 10.00 | 0.40 | 0.00         |
| 63            | Reed canary grass                   | 0.01  | 0.01  | 2.00  | 2.00  | 0.40 | 7.71         |
| 64            | Reed canary grass (other)           | 0.01  | 0.01  | 5.00  | 0.00  | 0.00 | 0.00         |
| 65            | Salix                               | 10.00 | 1.00  | 15.00 | 2.00  | 0.50 | 9.63         |
| 66            | Adapted reduced leakage zone        | 0.19  | 0.11  | 10.00 | 10.00 | 0.40 | 0.00         |
| 67            | Poplar                              | 1.00  | 1.00  | 0.00  | 0.00  | 0.20 | 3.85         |
| 68            | Hybrid aspen                        | 1.00  | 1.00  | 0.00  | 0.00  | 0.20 | 0.00         |
| 69            | Biodiversity fallow                 | 8.00  | 8.00  | 12.00 | 12.00 | 0.40 | 7.71         |
| 70            | Strawberry                          | 3.00  | 2.00  | 15.00 | 0.00  | 0.20 | 3.85         |
| 71            | Berries (other)                     | 5.00  | 4.00  | 15.00 | 7.00  | 0.30 | 5.78         |
| 72            | Fruits                              | 20.00 | 1.00  | 15.00 | 7.00  | 0.30 | 0.00         |
| 73            | Garden plants                       | 10.00 | 10.00 | 4.00  | 4.00  | 0.20 | 3.85         |
| 74            | Vegetable crops                     | 0.01  | 0.01  | 0.00  | 0.00  | 0.00 | 0.00         |
| 75            | Riparian strip                      | 0.19  | 0.11  | 10.00 | 10.00 | 0.40 | 0.00         |
| 76            | Riparian strip (other)              | 0.19  | 0.11  | 10.00 | 10.00 | 0.40 | 0.00         |
| 77            | Riparian strip <sup>4</sup>         | 0.19  | 0.11  | 10.00 | 10.00 | 0.40 | 0.00         |
| 78            | Nurseries for permanent crops       | 0.10  | 0.10  | 4.00  | 4.00  | 0.20 | 0.00         |
| 79            | Aromatic herbs and vegetable seeds  | 10.00 | 10.00 | 10.00 | 15.00 | 0.20 | 3.85         |
| 80            | Forage (green fodder)               | 0.19  | 0.11  | 10.00 | 10.00 | 0.40 | 0.00         |
| 81            | Green manure                        | 0.19  | 0.11  | 10.00 | 10.00 | 0.40 | 0.00         |
| 82            | Wetlands                            | 2.00  | 2.00  | 12.00 | 12.00 | 0.40 | 0.00         |

*Continued on next page*<sup>3</sup> non-eligible for single payment scheme<sup>4</sup> within agri-environmental scheme for riparian strips

Table S4 – *Continued from previous page*

| Land-use code | Description                             | FC 1  | FC 2  | FA 1  | FA 2  | NA   | Nests per ha |
|---------------|-----------------------------------------|-------|-------|-------|-------|------|--------------|
| 83            | Christmas trees                         | 1.00  | 1.00  | 0.00  | 0.00  | 0.20 | 0.00         |
| 84            | Afforestation                           | 1.00  | 1.00  | 10.00 | 10.00 | 0.80 | 15.41        |
| 85            | Horticulture (non-household vegetables) | 10.00 | 10.00 | 4.00  | 4.00  | 0.20 | 0.00         |
| 86            | Non-eligible crop <sup>5</sup>          | 0.19  | 0.11  | 10.00 | 10.00 | 0.40 | 0.00         |
| 87            | Other eligible crop <sup>5</sup>        | 0.19  | 0.11  | 10.00 | 10.00 | 0.40 | 0.00         |
| 88            | Other landuse (arable field)            | 3.00  | 6.00  | 15.00 | 15.00 | 0.50 | 0.00         |
| 89            | Other landuse (pasture)                 | 0.19  | 0.11  | 12.00 | 12.00 | 0.40 | 0.00         |
| 91            | Non-approved crop (arable field)        | 0.19  | 0.11  | 10.00 | 10.00 | 0.40 | 0.00         |
| 92            | Non-approved crop (pasture)             | 0.19  | 0.11  | 12.00 | 12.00 | 0.40 | 0.00         |
| 93            | Non-approved crop (other land)          | 0.19  | 0.11  | 10.00 | 10.00 | 0.40 | 0.00         |
| 94            | Flooded land                            | 0.19  | 0.11  | 12.00 | 12.00 | 0.40 | 0.00         |
| 95            | Pasture under restoration <sup>6</sup>  | 0.19  | 0.11  | 12.00 | 12.00 | 0.40 | 0.00         |
| 96            | Mosaic pastures <sup>6</sup>            | 0.19  | 0.11  | 12.00 | 12.00 | 0.40 | 0.00         |
| 97            | Pasture <sup>7</sup>                    | 0.19  | 0.11  | 12.00 | 12.00 | 0.40 | 0.00         |
| 98            | Mown meadow <sup>7</sup>                | 0.19  | 0.11  | 12.00 | 12.00 | 0.40 | 0.00         |
| 99            | Crop missing                            | 0.19  | 0.11  | 10.00 | 10.00 | 0.40 | 0.00         |
| 100           | Not Scania                              | 0.00  | 0.00  | 0.00  | 0.00  | 0.00 | 0.00         |
| 101           | City center                             | 0.10  | 0.10  | 0.00  | 0.00  | 0.00 | 0.00         |
| 102           | City urban                              | 0.20  | 0.20  | 5.00  | 5.00  | 0.00 | 0.00         |
| 103           | City suburb                             | 2.00  | 2.00  | 10.00 | 10.00 | 0.40 | 7.71         |
| 104           | Village                                 | 2.00  | 2.00  | 10.00 | 10.00 | 0.40 | 0.00         |
| 105           | Rural settlement                        | 2.00  | 2.00  | 10.00 | 10.00 | 0.40 | 0.00         |
| 106           | Industrial area                         | 0.10  | 0.10  | 0.00  | 0.00  | 0.00 | 0.00         |
| 107           | Road railroad                           | 3.00  | 3.00  | 10.00 | 10.00 | 0.40 | 0.00         |
| 108           | Harbour                                 | 0.10  | 0.10  | 0.00  | 0.00  | 0.00 | 0.00         |
| 109           | Airport                                 | 0.10  | 0.10  | 0.00  | 0.00  | 0.00 | 0.00         |
| 110           | Sand gravel extraction                  | 0.20  | 0.20  | 5.00  | 5.00  | 0.00 | 0.00         |

*Continued on next page*<sup>5</sup> within agri-environmental scheme for organic farming<sup>6</sup> within agri-environmental scheme for selected environment<sup>7</sup> non-eligible for single payment scheme

Table S4 – *Continued from previous page*

| Land-use code | Description                | FC 1 | FC 2 | FA 1  | FA 2  | NA   | Nests per ha |
|---------------|----------------------------|------|------|-------|-------|------|--------------|
| 111           | Mineral extraction         | 0.10 | 0.10 | 0.00  | 0.00  | 0.00 | 0.00         |
| 112           | Dumps                      | 0.20 | 0.20 | 5.00  | 5.00  | 0.00 | 0.00         |
| 113           | Construction site          | 0.10 | 0.10 | 0.00  | 0.00  | 0.00 | 0.00         |
| 114           | Green urban area           | 4.00 | 4.00 | 10.00 | 10.00 | 0.40 | 0.00         |
| 115           | Sport leisure facility     | 0.10 | 0.10 | 0.00  | 0.00  | 0.00 | 0.00         |
| 117           | Ski slope                  | 0.19 | 0.11 | 12.00 | 12.00 | 0.40 | 0.00         |
| 118           | Golf course                | 2.00 | 2.00 | 10.00 | 10.00 | 0.75 | 14.45        |
| 119           | Non urban park             | 4.00 | 4.00 | 10.00 | 10.00 | 0.40 | 0.00         |
| 120           | Camping holiday homes      | 2.00 | 2.00 | 5.00  | 5.00  | 0.00 | 0.00         |
| 130           | Arable land                | 3.00 | 6.00 | 15.00 | 15.00 | 0.50 | 9.63         |
| 131           | Permanent crop             | 0.01 | 0.01 | 5.00  | 0.00  | 0.00 | 0.00         |
| 132           | Pasture                    | 0.19 | 0.11 | 12.00 | 12.00 | 0.40 | 0.00         |
| 140           | Deciduous woodland         | 5.00 | 0.50 | 12.00 | 0.00  | 0.20 | 3.85         |
| 141           | Deciduous woodland mire    | 2.00 | 0.50 | 12.00 | 0.00  | 0.20 | 0.00         |
| 142           | Deciduous woodland rock    | 5.00 | 0.50 | 12.00 | 0.00  | 0.20 | 0.00         |
| 143           | Coniferous woodland lichen | 2.00 | 0.10 | 10.00 | 0.00  | 0.20 | 3.85         |
| 144           | Coniferous woodland (5-15) | 0.00 | 0.00 | 0.00  | 0.00  | 0.00 | 0.00         |
| 145           | Coniferous woodland (>15)  | 2.00 | 0.10 | 10.00 | 0.00  | 0.20 | 0.00         |
| 146           | Coniferous woodland mire   | 2.00 | 0.10 | 10.00 | 0.00  | 0.20 | 0.00         |
| 147           | Coniferous woodland rock   | 2.00 | 0.10 | 10.00 | 0.00  | 0.20 | 0.00         |
| 148           | Mixed woodland             | 2.00 | 0.10 | 12.00 | 0.00  | 0.20 | 0.00         |
| 149           | Mixed woodland mire        | 2.00 | 0.10 | 12.00 | 0.00  | 0.20 | 0.00         |
| 150           | Mixed woodland rock        | 2.00 | 0.10 | 12.00 | 0.00  | 0.20 | 0.00         |
| 151           | Natural grassland          | 0.19 | 0.11 | 12.00 | 12.00 | 0.40 | 0.00         |
| 152           | Moorland                   | 0.00 | 2.00 | 0.00  | 15.00 | 0.50 | 9.63         |
| 153           | Scrub                      | 1.00 | 3.00 | 5.00  | 15.00 | 0.70 | 13.49        |
| 154           | Clearing                   | 1.00 | 3.00 | 5.00  | 15.00 | 0.70 | 0.00         |
| 155           | Young forest               | 0.00 | 0.00 | 0.00  | 0.00  | 0.00 | 0.00         |
| 156           | Coniferous woodland        | 2.00 | 0.10 | 10.00 | 0.00  | 0.20 | 0.00         |
| 158           | Beaches/dunes/sand planes  | 0.10 | 0.10 | 5.00  | 15.00 | 0.00 | 0.00         |

*Continued on next page*

Table S4 – *Continued from previous page*

| Land-use code | Description             | FC 1 | FC 2  | FA 1  | FA 2  | NA   | Nests per ha |
|---------------|-------------------------|------|-------|-------|-------|------|--------------|
| 159           | Bare rock               | 0.00 | 0.00  | 0.00  | 0.00  | 0.00 | 0.00         |
| 160           | Sparsely vegetated area | 0.10 | 0.10  | 5.00  | 15.00 | 1.00 | 19.27        |
| 161           | Burnt area              | 0.00 | 0.00  | 0.00  | 0.00  | 0.00 | 0.00         |
| 162           | Glaciers                | 0.00 | 0.00  | 0.00  | 0.00  | 0.00 | 0.00         |
| 163           | Grassland               | 0.19 | 0.11  | 12.00 | 12.00 | 0.40 | 0.00         |
| 164           | Meadow                  | 0.19 | 0.11  | 12.00 | 12.00 | 0.40 | 0.00         |
| 170           | Marshland               | 1.00 | 2.00  | 12.00 | 8.00  | 0.00 | 0.00         |
| 171           | Wet mire                | 1.00 | 2.00  | 10.00 | 2.00  | 0.00 | 0.00         |
| 172           | Mire                    | 0.10 | 3.00  | 10.00 | 2.00  | 0.00 | 0.00         |
| 173           | Peat extraction site    | 0.00 | 0.00  | 0.00  | 0.00  | 0.00 | 0.00         |
| 174           | Salt marsh              | 0.10 | 0.10  | 2.00  | 2.00  | 0.00 | 0.00         |
| 180           | Watercourse             | 0.00 | 0.00  | 0.00  | 0.00  | 0.00 | 0.00         |
| 181           | Open lake/pond          | 0.00 | 0.00  | 0.00  | 0.00  | 0.00 | 0.00         |
| 182           | Covered lake/pond       | 0.00 | 0.00  | 0.00  | 0.00  | 0.00 | 0.00         |
| 183           | Coastal lagoon          | 0.00 | 0.00  | 0.00  | 0.00  | 0.00 | 0.00         |
| 184           | Estuary                 | 0.00 | 0.00  | 0.00  | 0.00  | 0.00 | 0.00         |
| 185           | Open sea                | 0.00 | 0.00  | 0.00  | 0.00  | 0.00 | 0.00         |
| 186           | Covered sea             | 0.00 | 0.00  | 0.00  | 0.00  | 0.00 | 0.00         |
| 200           | Field margins           | 0.12 | 0.05  | 10.00 | 10.00 | 1.00 | 19.27        |
| -             | Flower strips           | 0.00 | 70.00 | 20.00 | 20.00 | 0.10 | 1.93         |

## 137 References

- 138 Brian AD. 1952. Division of labour and foraging in *bombus agrorum fabricius*. *The Journal of*  
139 *Animal Ecology* : 223–240.
- 140 Darvill B, Knight ME, Goulson D. 2004. Use of genetic markers to quantify bumblebee foraging  
141 range and nest density. *Oikos* **107**: 471–478.
- 142 Duchateau M, Velthuis H. 1988. Development and reproductive strategies in *bombus terrestris*  
143 colonies. *Behaviour* **107**: 186–207.
- 144 Free JB. 1955. The division of labour within bumblebee colonies. *Insectes sociaux* **2**: 195–212.
- 145 Goulson D, Hughes W, Derwent L, Stout J. 2002a. Colony growth of the bumblebee, *bombus*  
146 *terrestris*, in improved and conventional agricultural and suburban habitats. *Oecologia* **130**:  
147 267–273.
- 148 Goulson D, Peat J, Stout JC, Tucker J, Darvill B, Derwent LC, Hughes WO. 2002b. Can  
149 alloethism in workers of the bumblebee, *bombus terrestris*, be explained in terms of foraging  
150 efficiency? *Animal Behaviour* **64**: 123–130.
- 151 Hagen Ev. 1994. Hummeln, bestimmen, ansiedeln, vermehren, schützen. *Naturbuchverlag Augs-*  
152 *burg* .
- 153 Harder LD. 1986. Influences on the density and dispersion of bumble bee nests (hymenoptera:  
154 Apidae). *Ecography* **9**: 99–103.
- 155 Kleijn D, Winfree R, Bartomeus I, Carvalheiro LG, Henry M, Isaacs R, Klein AM, Kremen C,  
156 M’Gonigle LK, Rader R, et al. 2015. Delivery of crop pollination services is an insufficient  
157 argument for wild pollinator conservation. *Nature communications* **6**.
- 158 Knight ME, Martin AP, Bishop S, Osborne JL, Hale RJ, Sanderson RA, Goulson D. 2005. An  
159 interspecific comparison of foraging range and nest density of four bumblebee (*bombus*) species.  
160 *Molecular Ecology* **14**: 1811–1820.
- 161 McFrederick QS, LeBuhn G. 2006. Are urban parks refuges for bumble bees *bombus*  
162 spp.(hymenoptera: Apidae)? *Biological Conservation* **129**: 372–382.
- 163 Osborne JL, Martin AP, Carreck NL, Swain JL, Knight ME, Goulson D, Hale RJ, Sanderson  
164 RA. 2008. Bumblebee flight distances in relation to the forage landscape. *Journal of Animal*  
165 *Ecology* **77**: 406–415.
- 166 Persson AS, Olsson O, Rundlöf M, Smith HG. 2010. Land use intensity and landscape com-  
167 plexity—analysis of landscape characteristics in an agricultural region in southern sweden.  
168 *Agriculture, ecosystems & environment* **136**: 169–176.
- 169 Persson AS, Rundlöf M, Clough Y, Smith HG. 2015. Bumble bees show trait-dependent vulner-  
170 ability to landscape simplification. *Biodiversity and Conservation* : 1–21.
- 171 Riedinger V, Mitesser O, Hovestadt T, Steffan-Dewenter I, Holzschuh A. 2015. Annual dynamics  
172 of wild bee densities: attractiveness and productivity effects of oilseed rape. *Ecology* **96**:  
173 1351–1360.



- 174 Scheper J, Bommarco R, Holzschuh A, Potts SG, Riedinger V, Roberts SP, Rundlöf M, Smith  
175 HG, Steffan-Dewenter I, Wickens JB, et al. 2015. Local and landscape-level floral resources  
176 explain effects of wildflower strips on wild bees across four european countries. *Journal of*  
177 *Applied Ecology* **52**: 1165–1175.
- 178 Skovgaard O. 1936. Rødkloverens bestøvning. *Humblebier og Humleboer. Det Kongelige Danske*  
179 *Videnskabernes Selskabs Skrifter Naturvidenskabelig og Matematisk Afdeling* **9**: 1–140.
- 180 St John RC, Draper NR. 1975. D-optimality for regression designs: A review. *Technometrics*  
181 **17**: 15–23.
- 182 Svensson B, Lagerlöf J, Svensson BG. 2000. Habitat preferences of nest-seeking bumble bees  
183 (hymenoptera: Apidae) in an agricultural landscape. *Agriculture, Ecosystems & Environment*  
184 **77**: 247–255.
- 185 Walther-Hellwig K, Frankl R. 2000. Foraging habitats and foraging distances of bumblebees,  
186 *bombus* spp.(hym., apidae), in an agricultural landscape. *Journal of Applied Entomology* **124**:  
187 299–306.
- 188 Westphal C, Steffan-Dewenter I, Tschardt T. 2009. Mass flowering oilseed rape improves early  
189 colony growth but not sexual reproduction of bumblebees. *Journal of Applied Ecology* **46**:  
190 187–193.
- 191 Wheeler B. 2014. *AlgDesign: Algorithmic Experimental Design*. R package version 1.1-7.3.  
192 URL <https://CRAN.R-project.org/package=AlgDesign>
- 193 Wood TJ, Holland JM, Hughes WO, Goulson D. 2015. Targeted agri-environment schemes  
194 significantly improve the population size of common farmland bumblebee species. *Molecular*  
195 *ecology* **24**: 1668–1680.
